# Supplementary material
Source: ML conference proceedings conference paper supplement (https://openreview.net/forum?id=9bK38pUBzU)
Supplement: supplementary_material [file attachment]

Table 7: **LACO Hyperparameters**

| Hyperparameter                | Value                |
|-------------------------------|----------------------|
| Learning rate                 | 3e-5                 |
| Learning rate scheduler       | cosine decay to 1e-7 |
| # Mini-batches                | 32                   |
| Train Steps                   | 300000               |
| State Tokenizer Hidden Units  | (4096, 4096, 4096)   |
| Prediction Net Hidden Units   | (512, 256)           |
| Observation Tokenizer/Encoder | CLIP B/16            |
| Language Tokenizer/Encoder    | CLIP B/16            |
| # Attention Layers            | 4                    |
| # Attention Heads             | 16                   |
| # Token Dimension             | 768                  |

Table 8: **Multi-View MAE Hyperparameters**

| Hyperparameter              | Value |
|-----------------------------|-------|
| Learning rate               | 3e-5  |
| Learning rate scheduler     | None  |
| # Mini-batches              | 16    |
| Training Steps              | 20000 |
| Encoder # Layers            | 8     |
| Encoder # Head              | 12    |
| Encoder Embedding Dimension | 768   |
| Decoder # Layer             | 6     |
| Decoder # Head              | 16    |
| Decoder Embedding Dimension | 512   |
| Learned Modality Embeddings | True  |
| Mask Ratio                  | 0.8   |

**Table 9: TrajOpt Hyperparameters**

| Hyperparameter         | Value       |
|------------------------|-------------|
| # Steps                | 10          |
| Velocity Constraint    | [-0.4, 0.4] |
| $\mu_0$                | 2           |
| $s_0$                  | 0.01        |
| $c$                    | 0.75        |
| $\tau^+$               | 1.1         |
| $\tau^-$               | 0.5         |
| $k$                    | 10          |
| $f_{tol}$              | 0.0001      |
| $x_{tol}$              | 0.0001      |
| $c_{tol}$              | 0.01        |
| solver                 | ECOS        |
| # Penalty Iterations   | 5           |
| # Convexify Iterations | 5           |
| # Trust Iterations     | 2           |
| Min Trust Box Size     | 0.0001      |
